# Supplementary material
Source: PubMed Central journal article supplement (PMC4450999)
Supplement: NIHMS676874-supplement-13.pdf [file NIHMS676874-supplement-13.pdf]

**a****High Pain / Low Pain**

(genetically separated rats)

Whole genome DRG Expression Screen

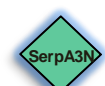**SerpA3N**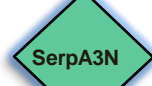

Role – Gain / Loss-of Function

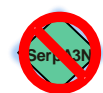**Pain ++**

SerpA3N KO

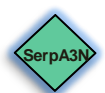**Pain --**

rSerpA3N injection

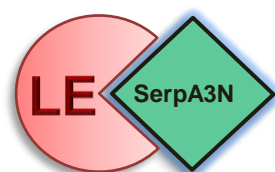

SerpA3N Functional Partner Assay

**Leukocyte Elastase (LE)**

T cells

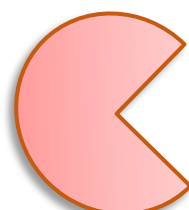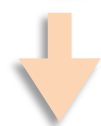**LE**  
**Pain**

T cells neurons

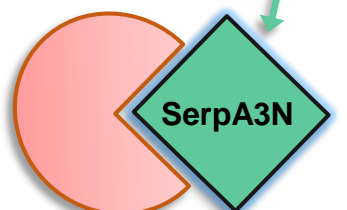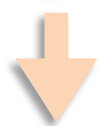**LE ↓**  
**↓ Pain**  
Endogenous

T cells

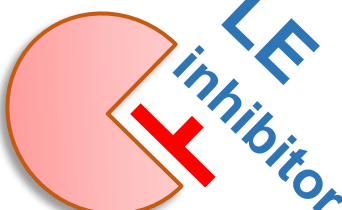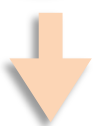**LE ↓**  
**↓ Pain**  
Therapy**b**

Early Transition Chronic

Nerve injury

Sensory neurons:

SerpA3N

T cells:

Leukocyte Elastase (LE)

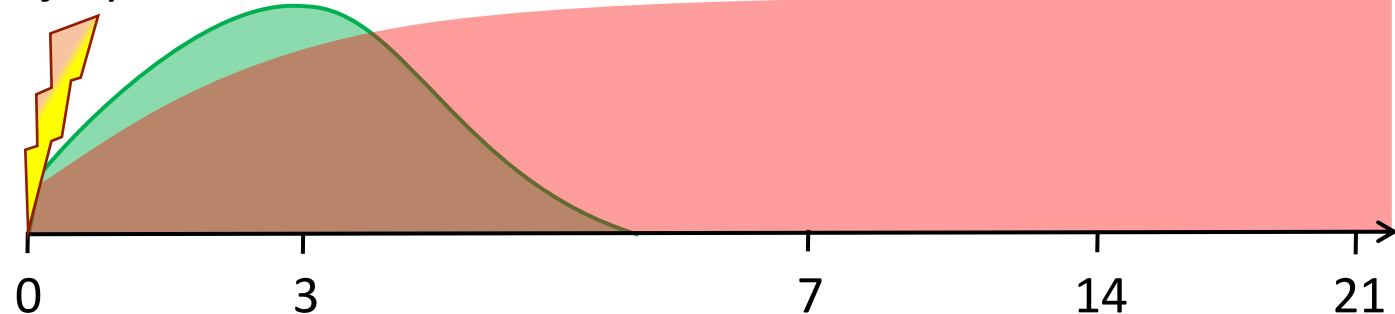

Time after injury (d)

Nerve injury

LE inhibitor  
Endogenous action  
SerpA3N actionExogenous  
SerpA3N action

LE inhibitor action?

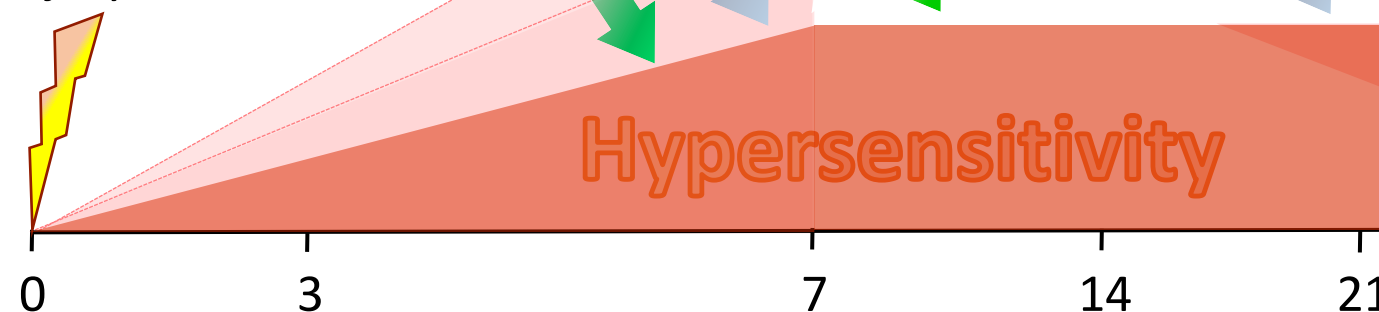

Time after injury (d)
