# Supplementary material
Source: PubMed Central journal article supplement (PMC4450999)

## Supplementary Figure 9

**a**

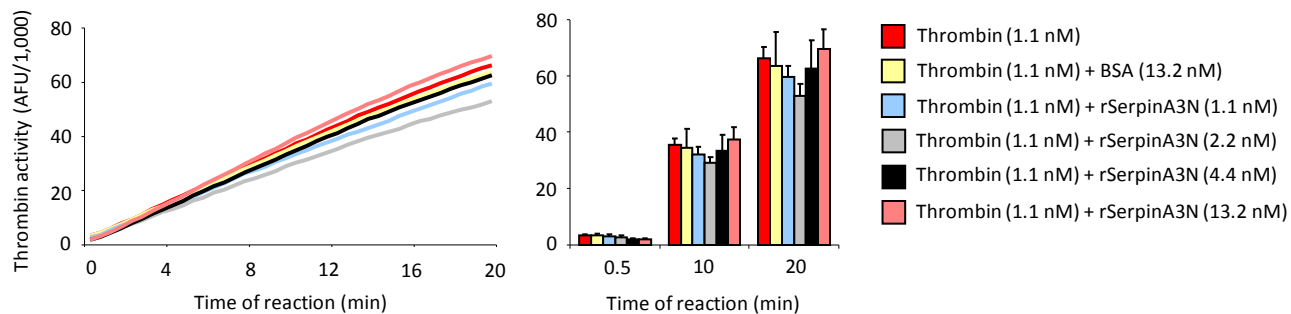

**b**

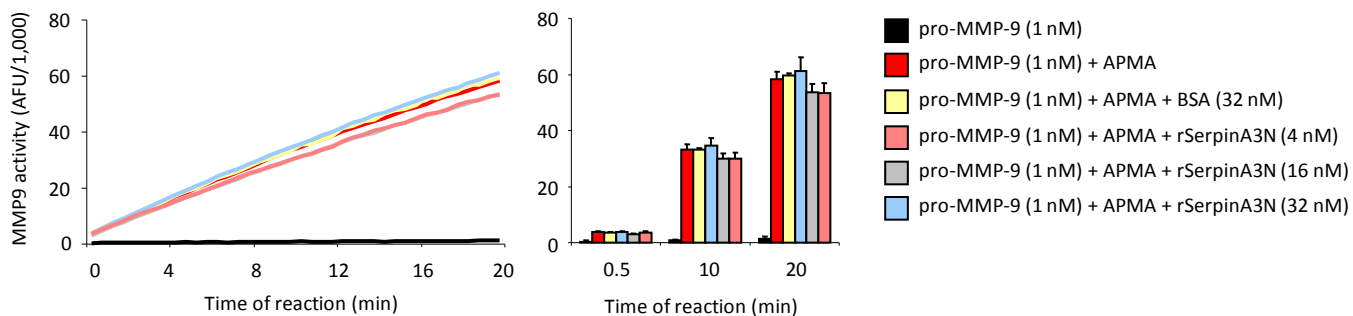

**c**

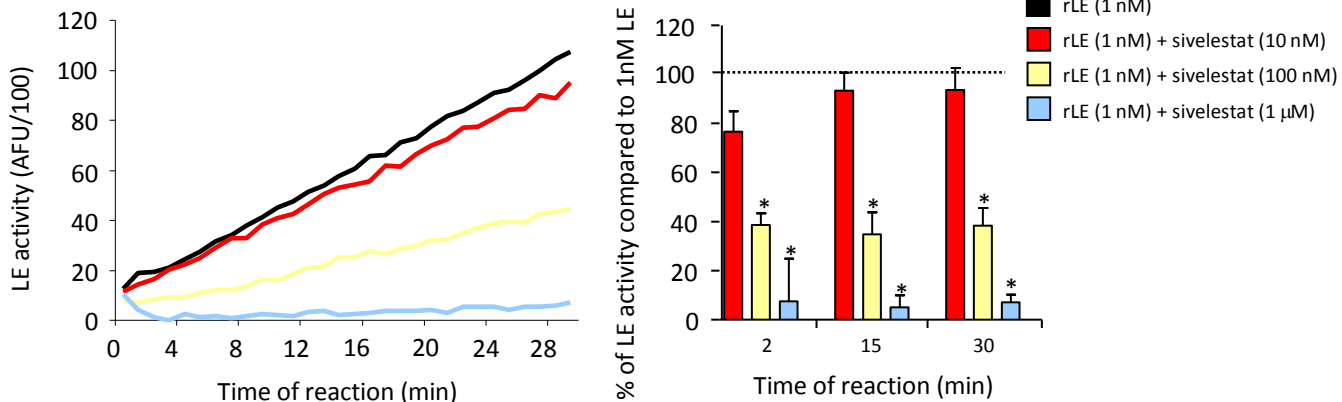

Supplement: NIHMS676874-supplement-10.pdf [file NIHMS676874-supplement-10.pdf]

# Supplementary Figure 10

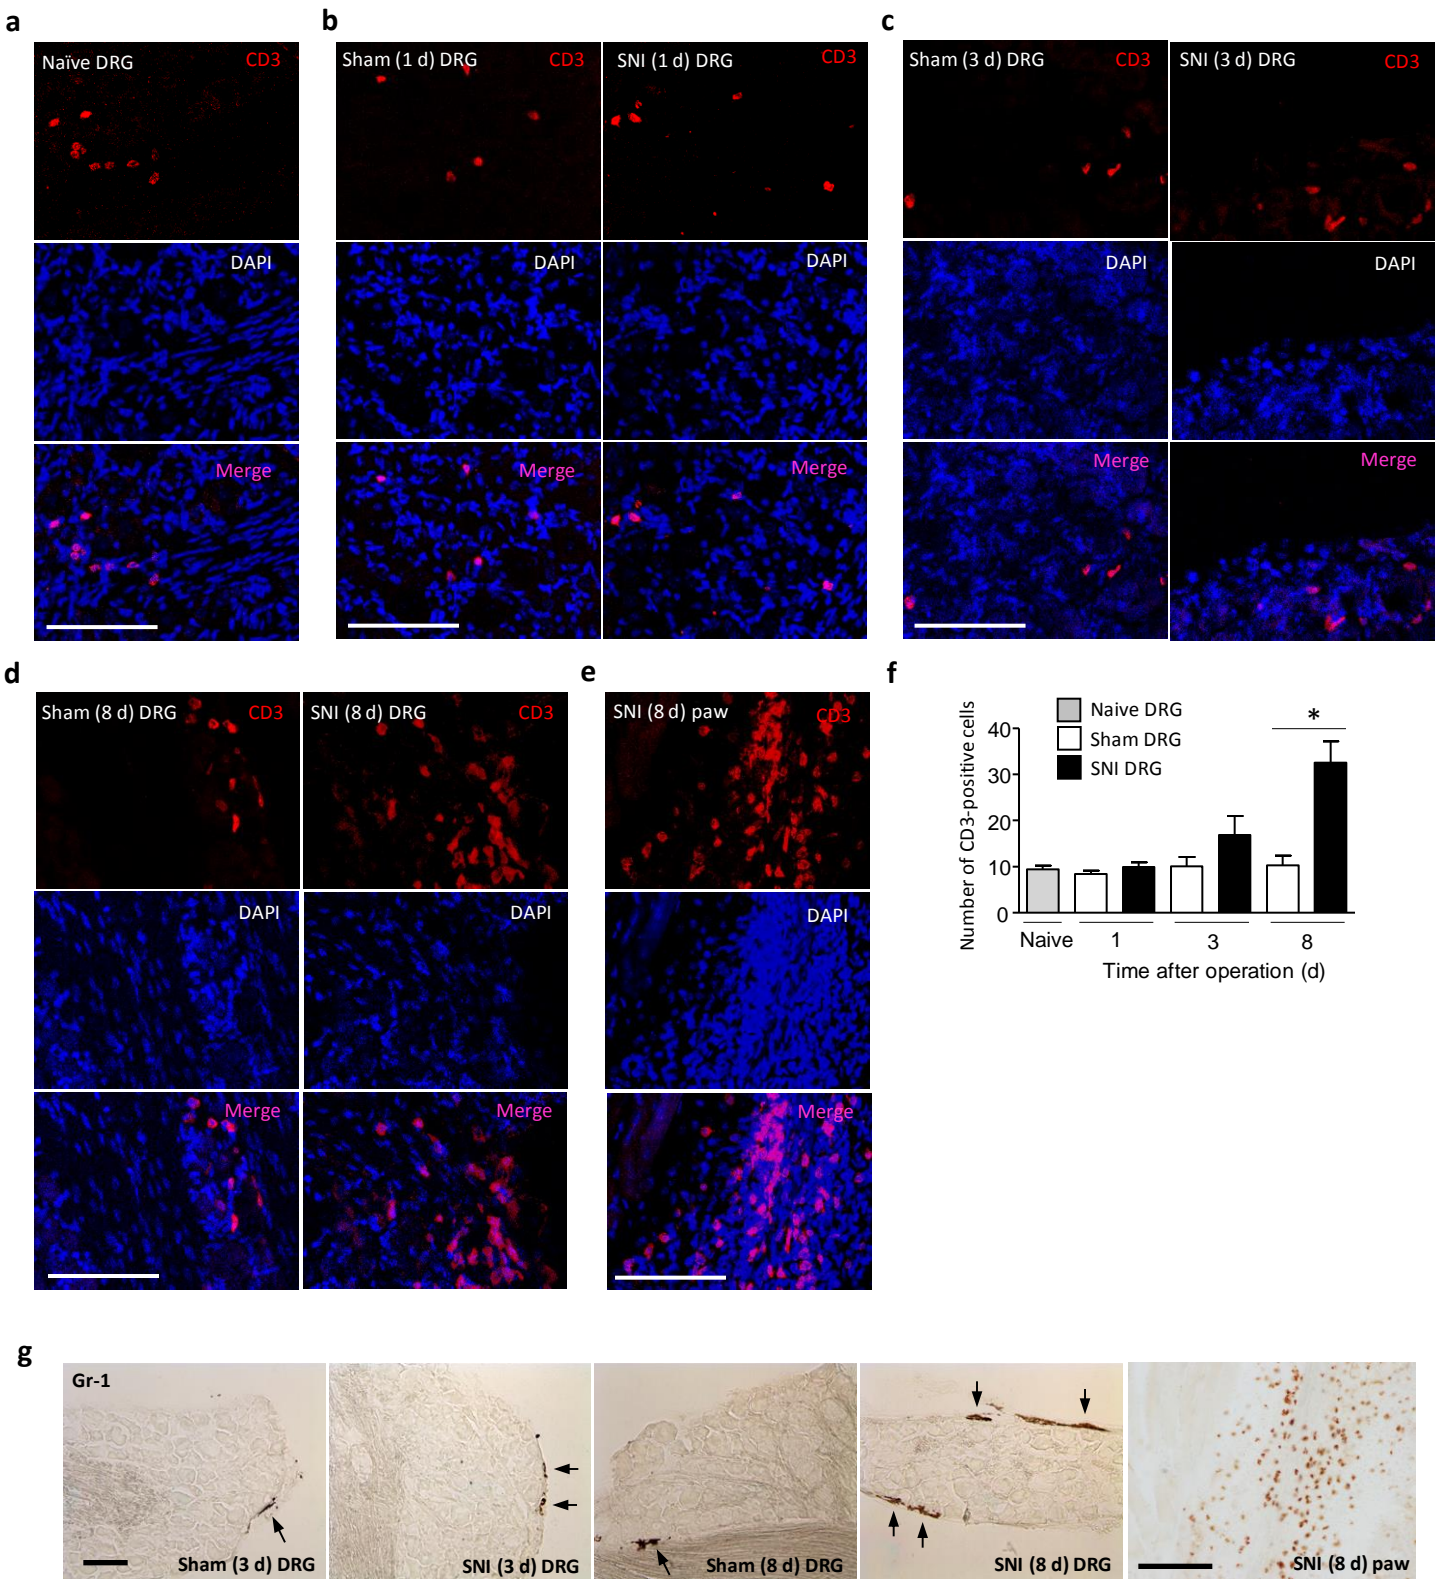

Supplement: NIHMS676874-supplement-11.pdf [file NIHMS676874-supplement-11.pdf]

# Supplementary Figure 11

**a**

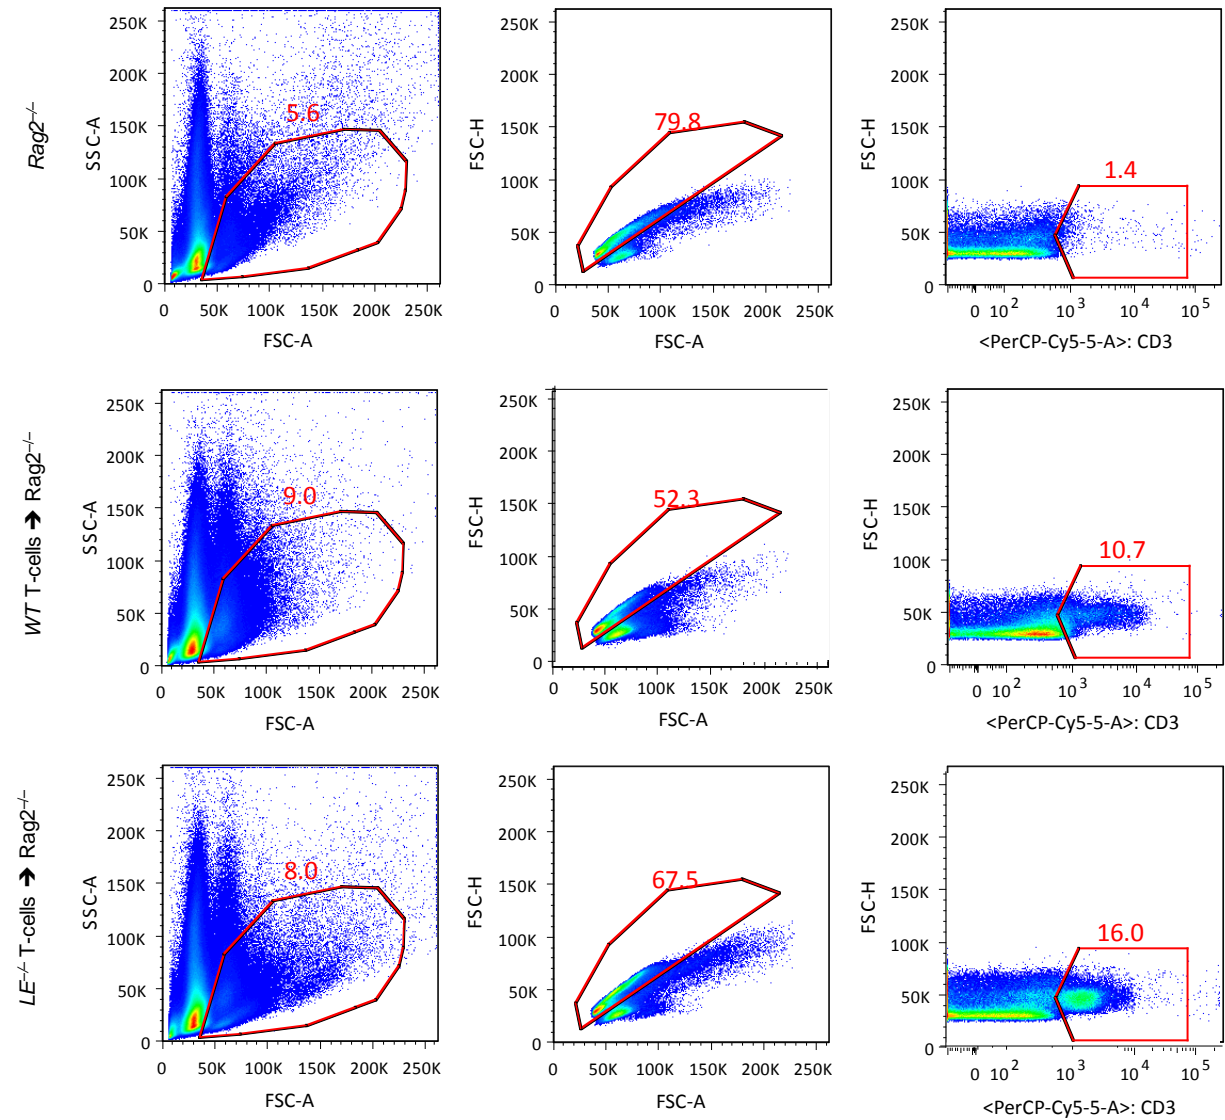

**b**

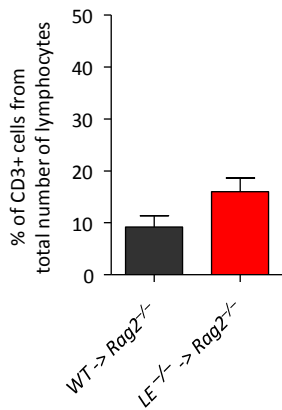

Supplement: NIHMS676874-supplement-12.pdf [file NIHMS676874-supplement-12.pdf]

# Supplementary Figure 1

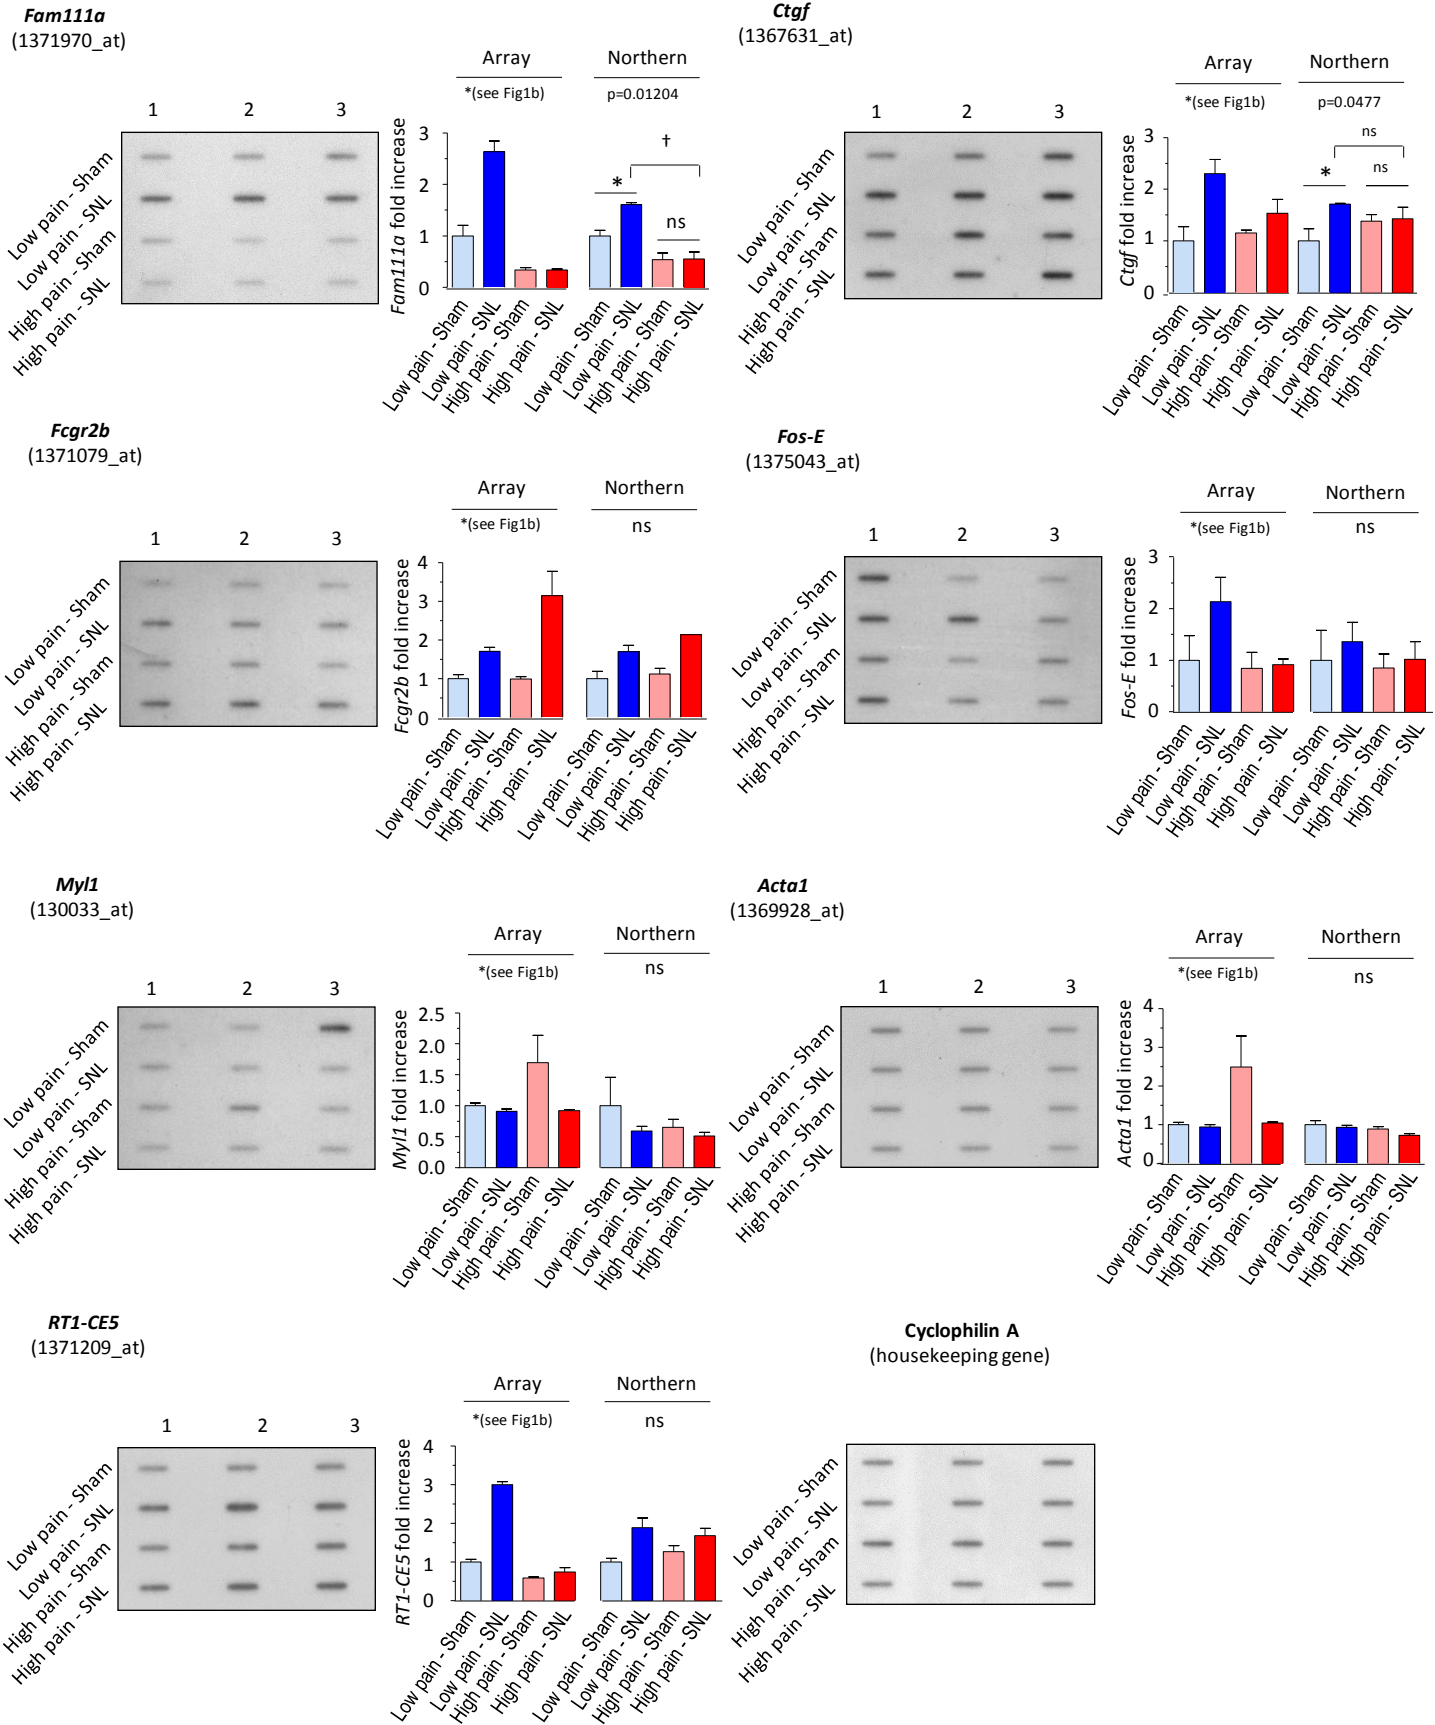

Supplement: NIHMS676874-supplement-2.pdf [file NIHMS676874-supplement-2.pdf]

## Supplementary Figure 2

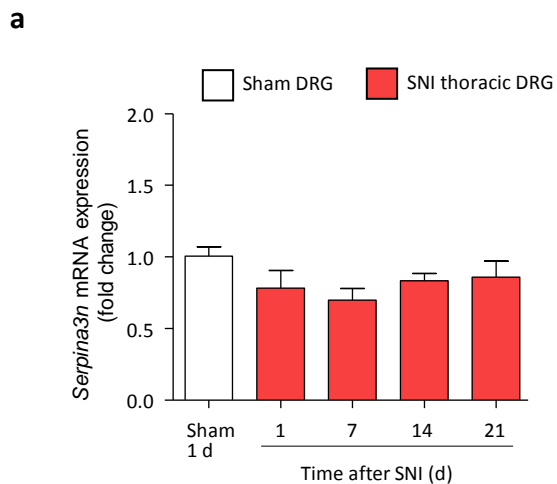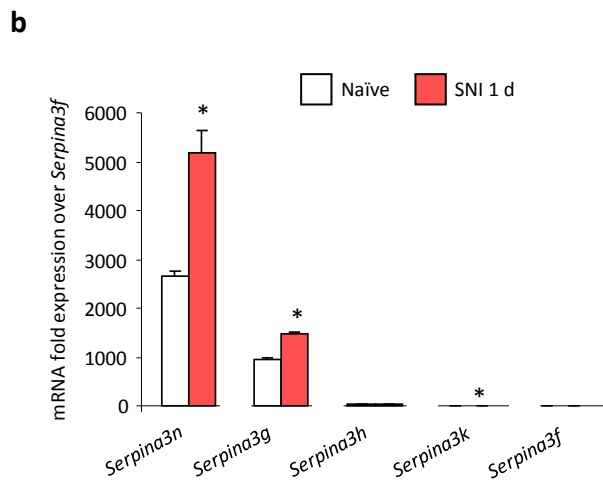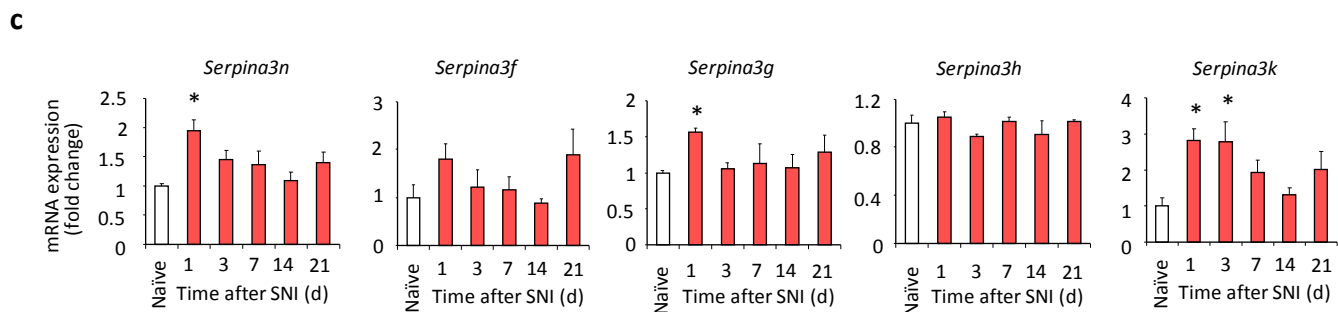

Supplement: NIHMS676874-supplement-3.pdf [file NIHMS676874-supplement-3.pdf]

# Supplementary Figure 3

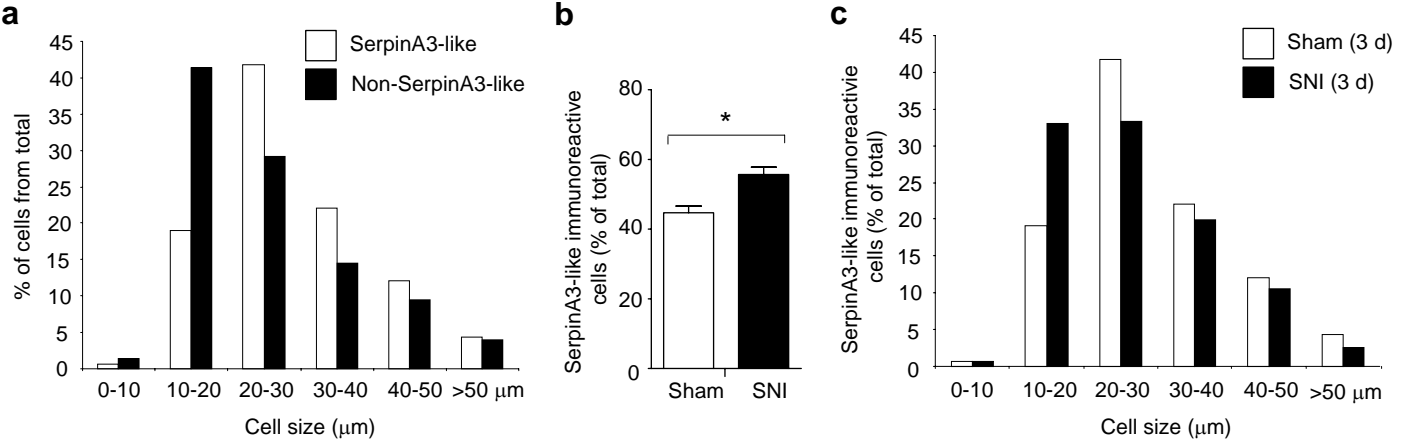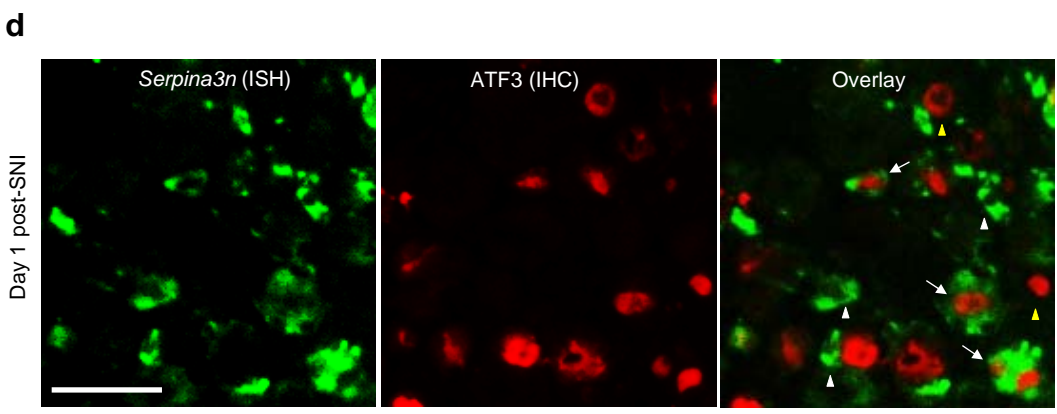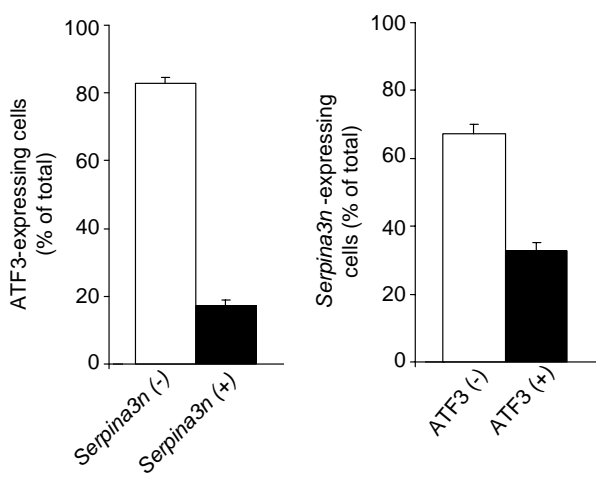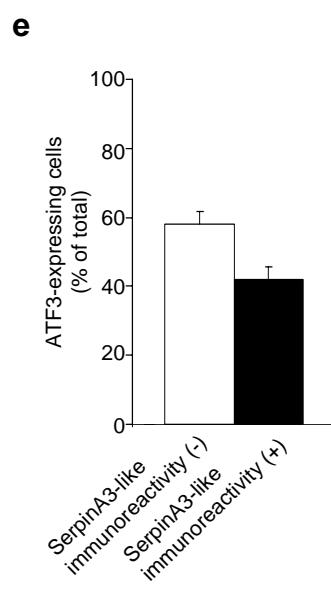

Supplement: NIHMS676874-supplement-4.pdf [file NIHMS676874-supplement-4.pdf]

# Supplementary Figure 4

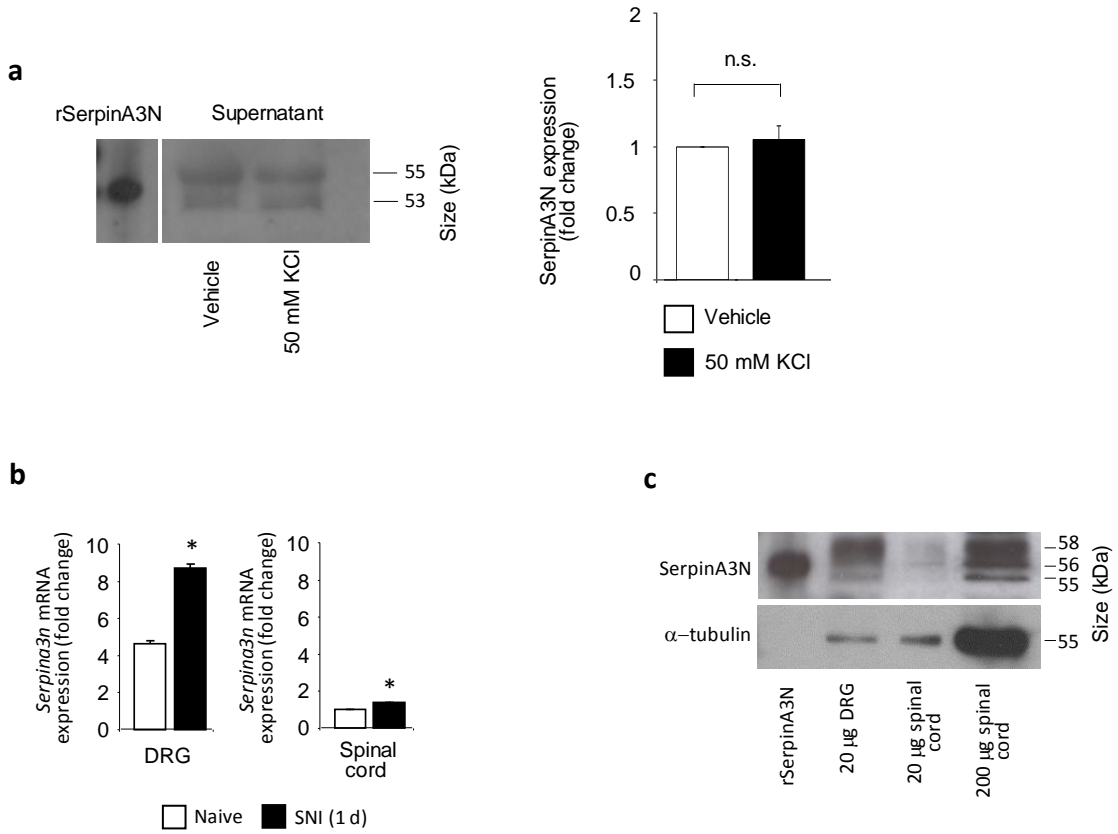

Supplement: NIHMS676874-supplement-5.pdf [file NIHMS676874-supplement-5.pdf]

# Supplementary Figure 5

**a**

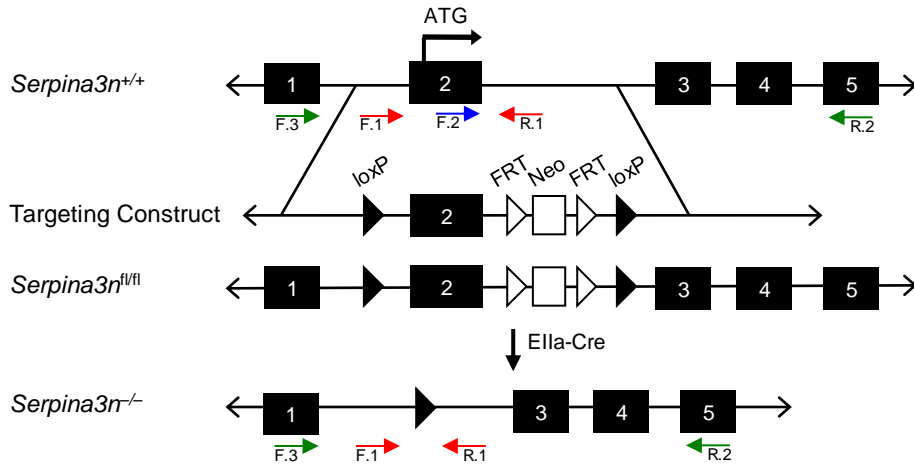

**b**

## Genomic DNA

+/+ F.2/R.1 459 bp  
 -/- F.1/R.1 518 bp

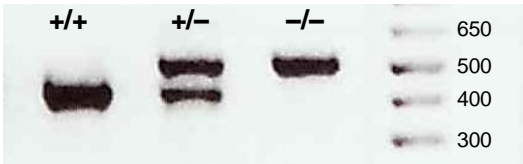

## cDNA

+/+ F.3/R.2 1362 bp  
 -/- F.3/R.2 708 bp

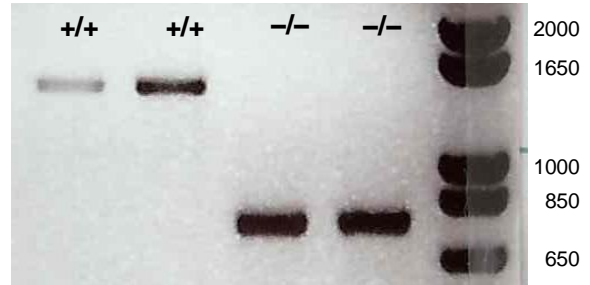

Supplement: NIHMS676874-supplement-6.pdf [file NIHMS676874-supplement-6.pdf]

# Supplemental Figure 6

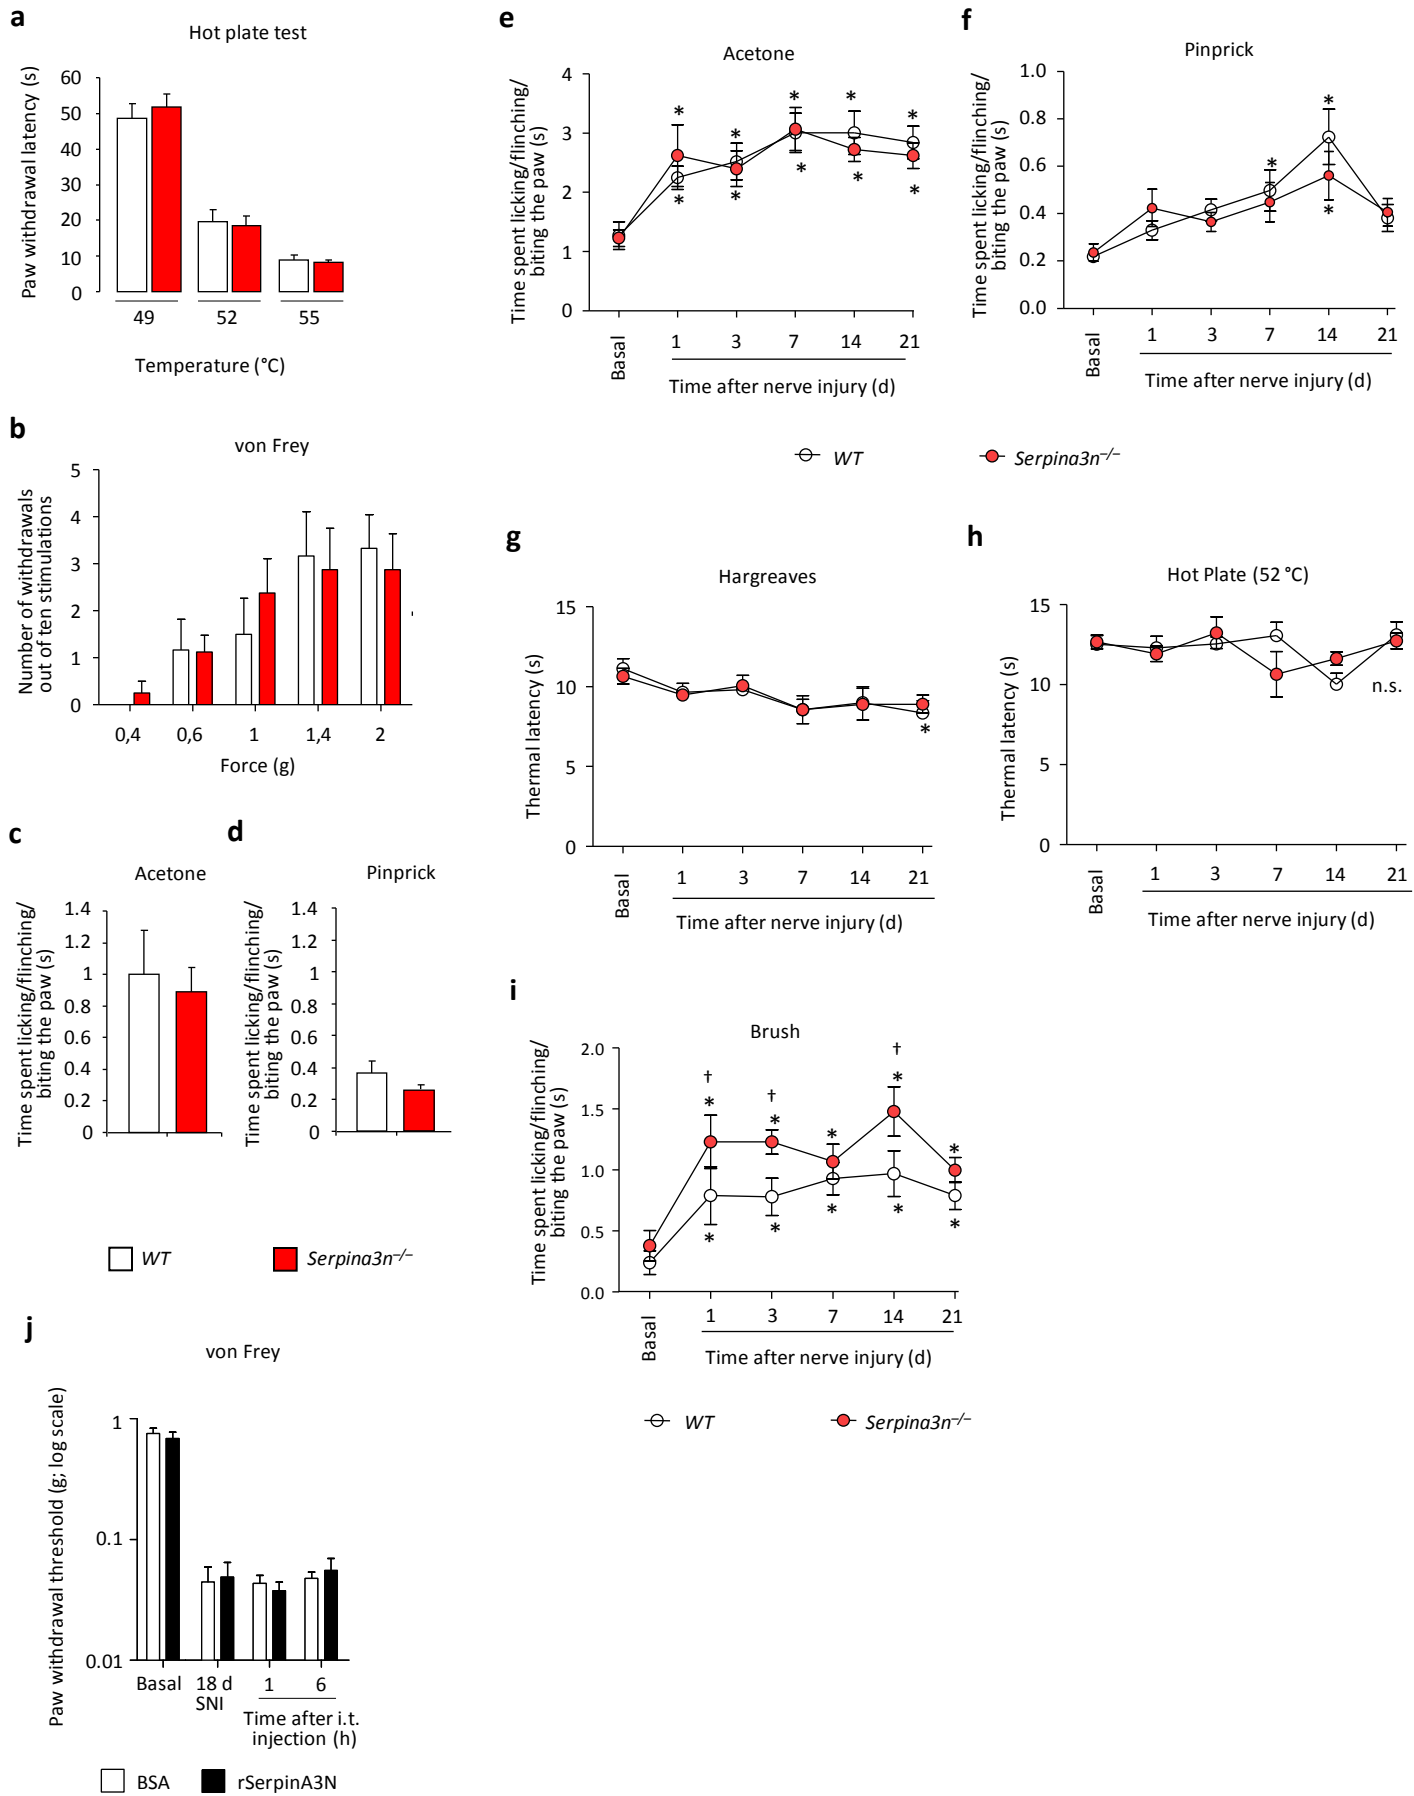

Supplement: NIHMS676874-supplement-7.pdf [file NIHMS676874-supplement-7.pdf]

# Supplementary Figure 7

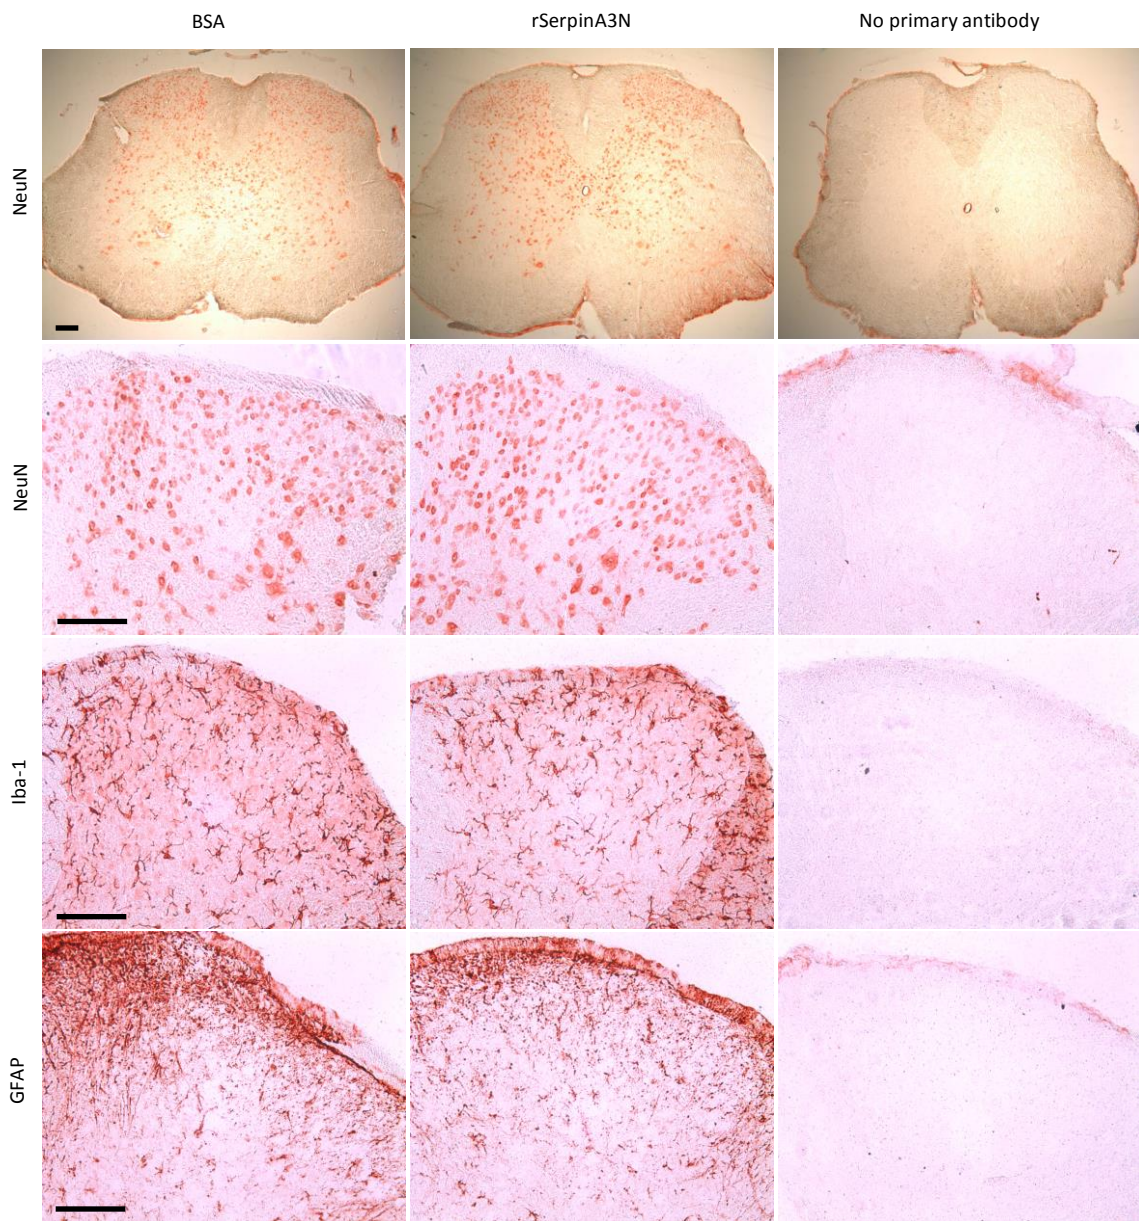

Supplement: NIHMS676874-supplement-8.pdf [file NIHMS676874-supplement-8.pdf]

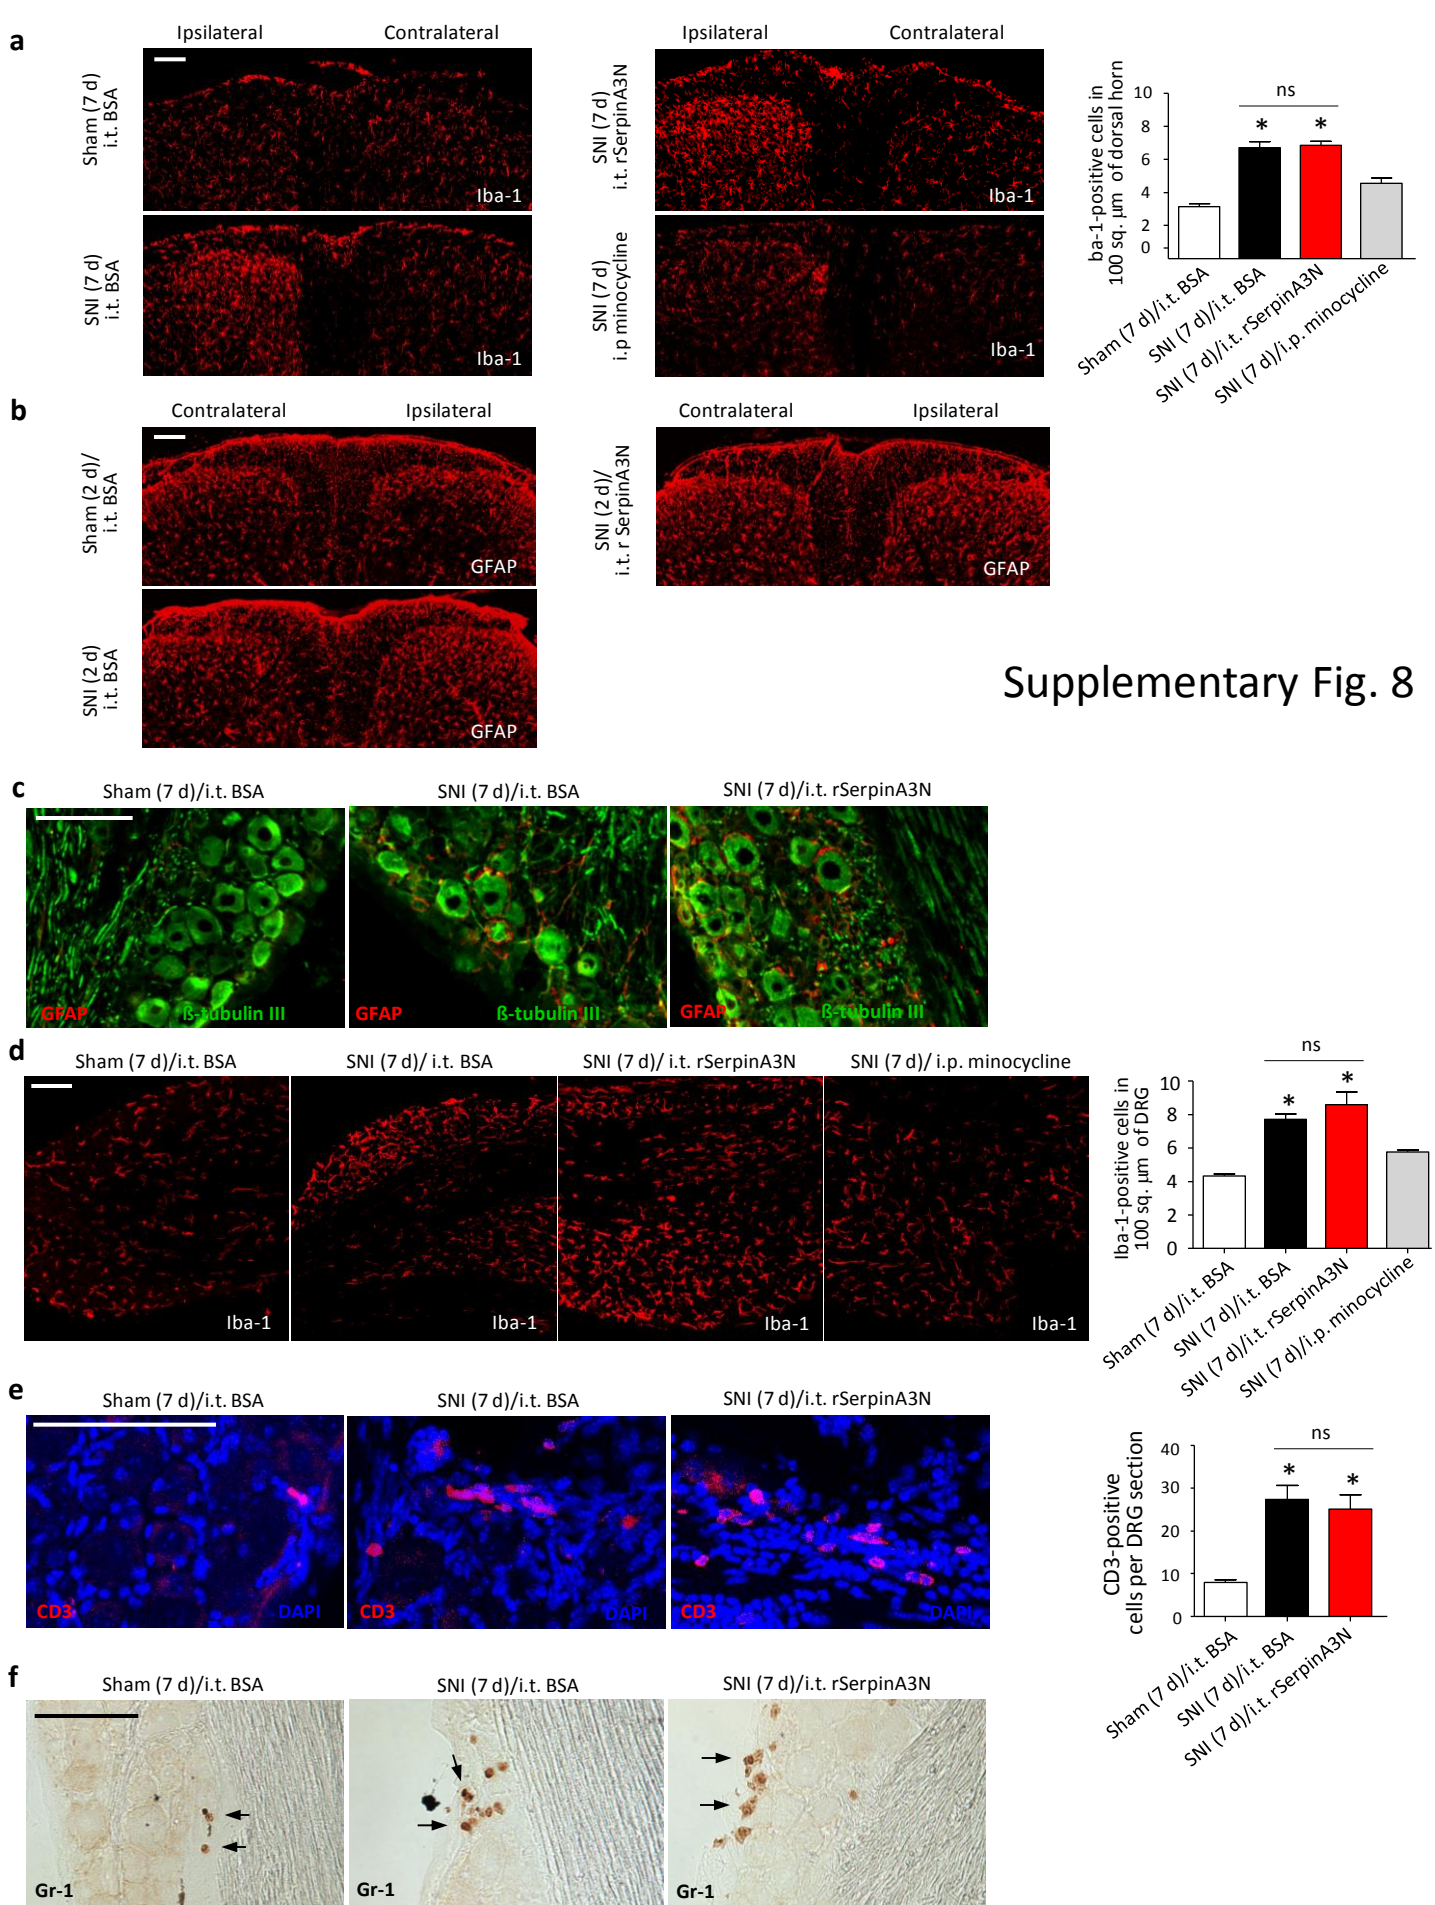

Supplementary Fig. 8

Supplement: NIHMS676874-supplement-9.pdf [file NIHMS676874-supplement-9.pdf]
